# Supplementary material for: Sulfoxides and sulfones as solvents for the manufacture of alkyl polyglycosides without added catalyst
Source: Royal Society of Chemistry journal article supplement (doi:10.1039/c3gc41059e), 2013-01-01
Supplement: c3gc41059e.pdf [file c3gc41059e.pdf]

## SULFOXIDES AND SULFONES AS SOLVENTS FOR THE MANUFACTURE OF ALKYL POLYGLYCOSIDES WITHOUT ADDED CATALYST

Camille Ludot <sup>a,b</sup>, Boris Estrine <sup>a</sup>, Jean Le Bras <sup>\*b</sup>, Norbert Hoffmann <sup>b</sup>,  
Sinisa Marinkovic <sup>\*a</sup> and Jacques Muzart <sup>b</sup>

a Agro-industrie Recherches et Développements, Green Chemistry Department, Route de Bazancourt,  
POMACLE, France. Fax: +33 (0)3 26 05 42 89; Tel: +33 (0)3 26 05 42 80; E-mail: s.marinkovic@a-r-d.fr

b Institut de Chimie Moléculaire de Reims, UMR 7312, CNRS-Université de Reims Champagne-Ardenne, UFR  
des Sciences Exactes et Naturelles, BP 1039, 51687 REIMS Cedex 2, France. Fax: +33 (0)3 26 91 31 66; Tel: +33  
(0)3 26 91 32 46; E-mail: jean.lebras@univ-reims.fr

### HPLIC analysis of organic acids:

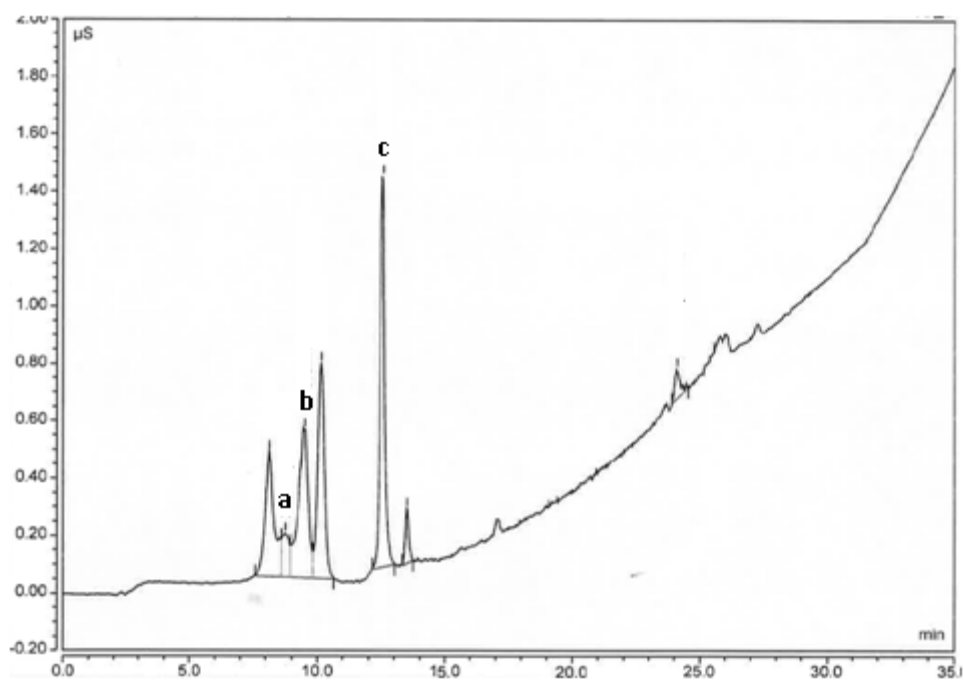

**Figure 1.** HPLIC chromatogram of the thermal degradation of D-xylose in DMSO (a, lactic acid; b, acetic acid; c, formic acid)

**Scheme 1:** Gas Chromatography monitoring and pH monitoring of the thermal degradation of D-xylose in DMSO

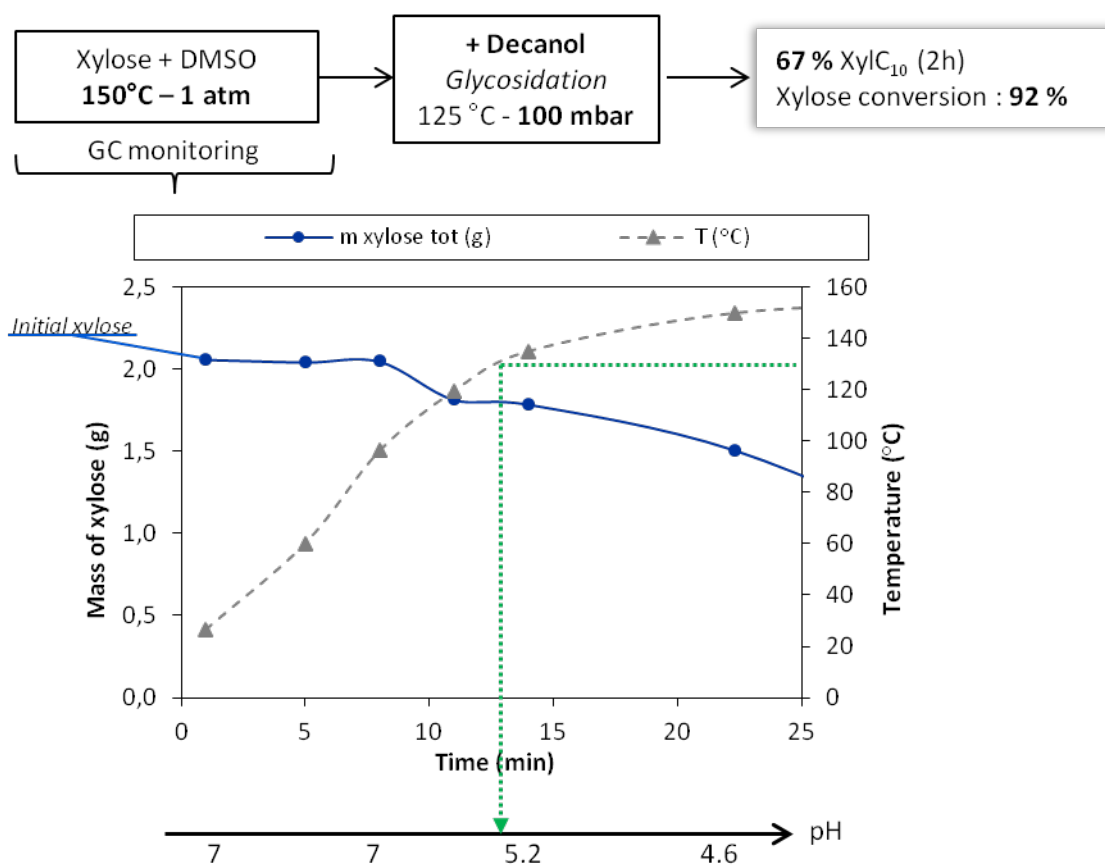

**Recycling of DMSO<sub>2</sub>:**

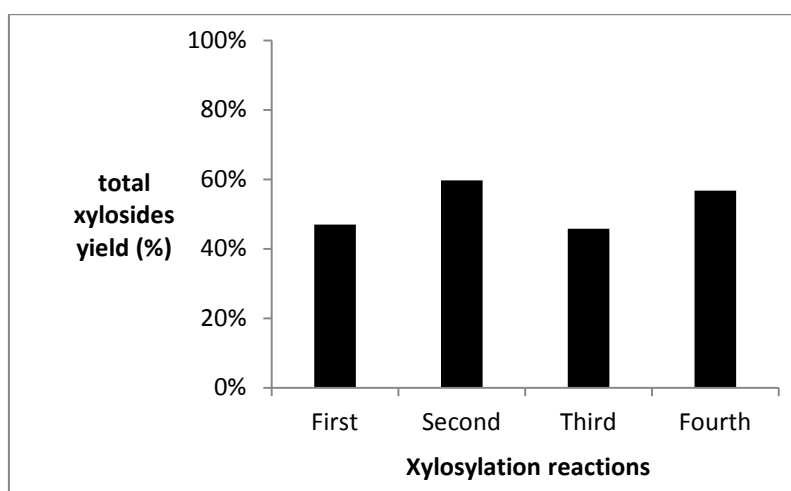

**Figure 2.** Successive xylosylation reactions in dimethylsulfoxide. Reaction conditions as described for Table 4

### Effects of temperature and added catalyst on glycosidation reactions in sulfolane:

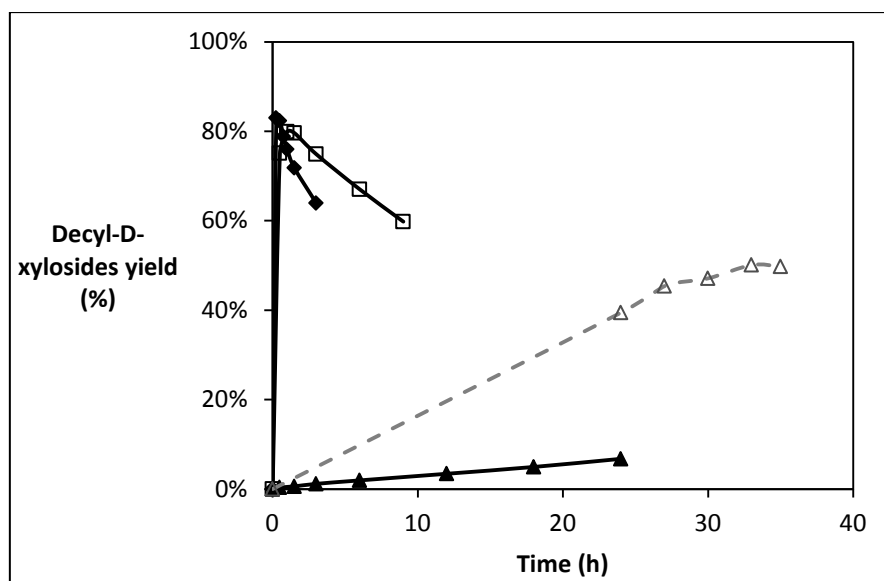

**Figure 3.** Yield of decyl-D-xylosides as a function of time

T = 150 °C (♦); 125 °C (□); 90 °C (▲) ; 90 °C in the presence of formic acid as catalyst (△)  
Reaction condition: D-xylose (0.033 mol), Sulfolane (6 mol. equivalent based on D-xylose), Decanol (9 mol. equivalent based on D-xylose), air atmosphere

### Characterization of decyl-D-xylosides produced by glycosidation of D-xylose with decanol in sulfolane (Table 4, Entry 5):

#### Biodegradation

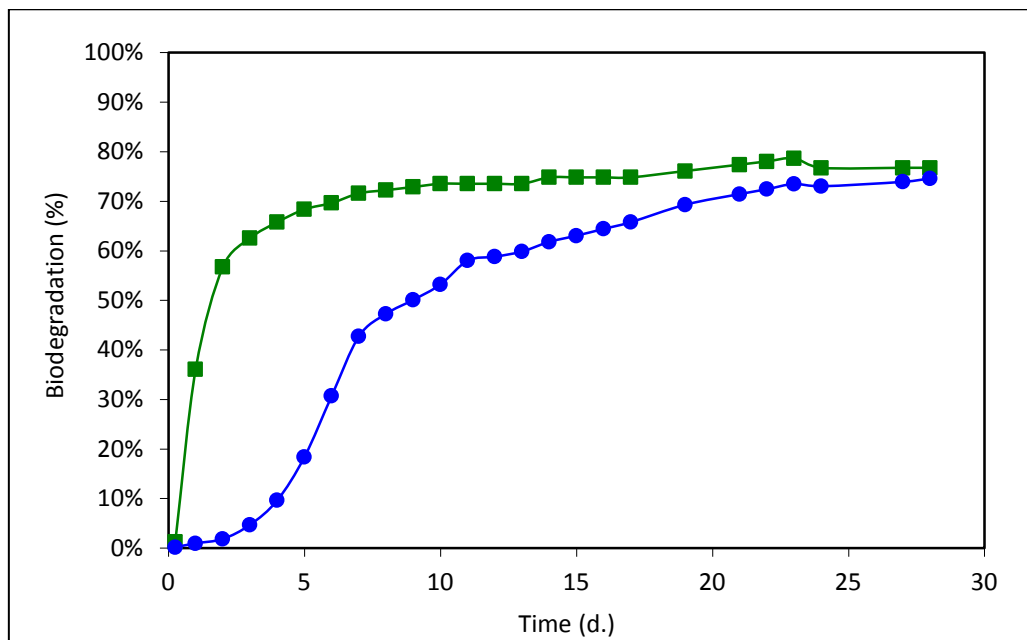

**Figure 4.** Evolution of the ultimate biodegradability of decyl D-xylosides over 30 days (■, NaOAc (standard); ●, decyl D-xylosides) (according to OCDE 301F standard)

### Physico-chemical properties

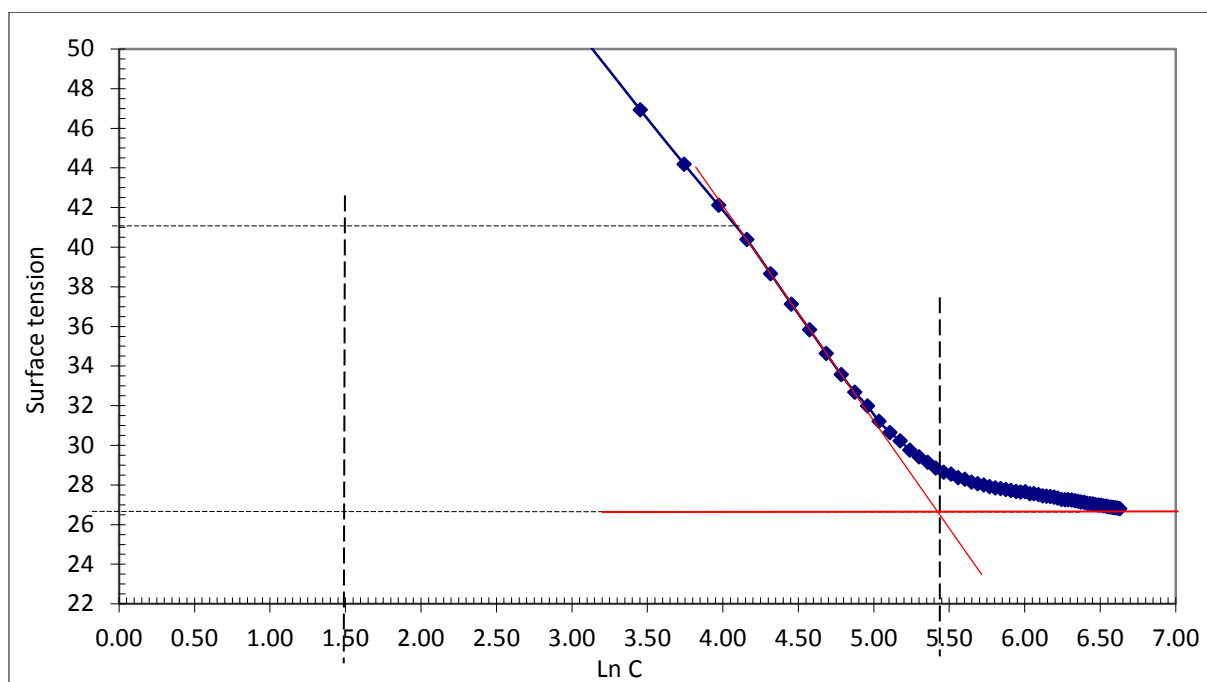

**Figure 5.** Determination of the surface tension versus decyl D-xylosides concentration<sup>1</sup>

<sup>1</sup> S. Marinkovic and B. Estrine, *Green Chem.*, 2010, **12**, 1929

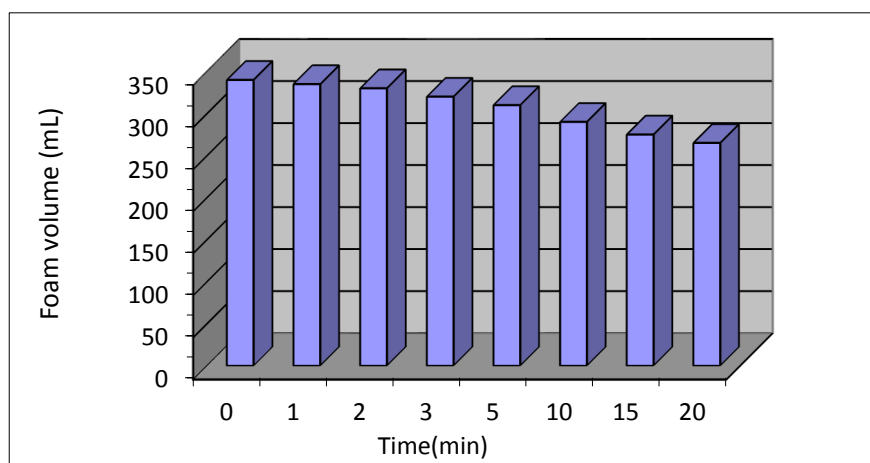

**Figure 6.** Determination of the foam power of decyl D-xylosides following Ross Miles tests<sup>2</sup>

Foam production versus time (50 °C) = 340 mL (stability at 20min = 77.9 %)

Wetting power following Draves tests: (25 °C) = 10 s ± 1 s

<sup>2</sup> S. Marinkovic and B. Estrine, *Green Chem.*, 2010, **12**, 1929

RMN analysis:

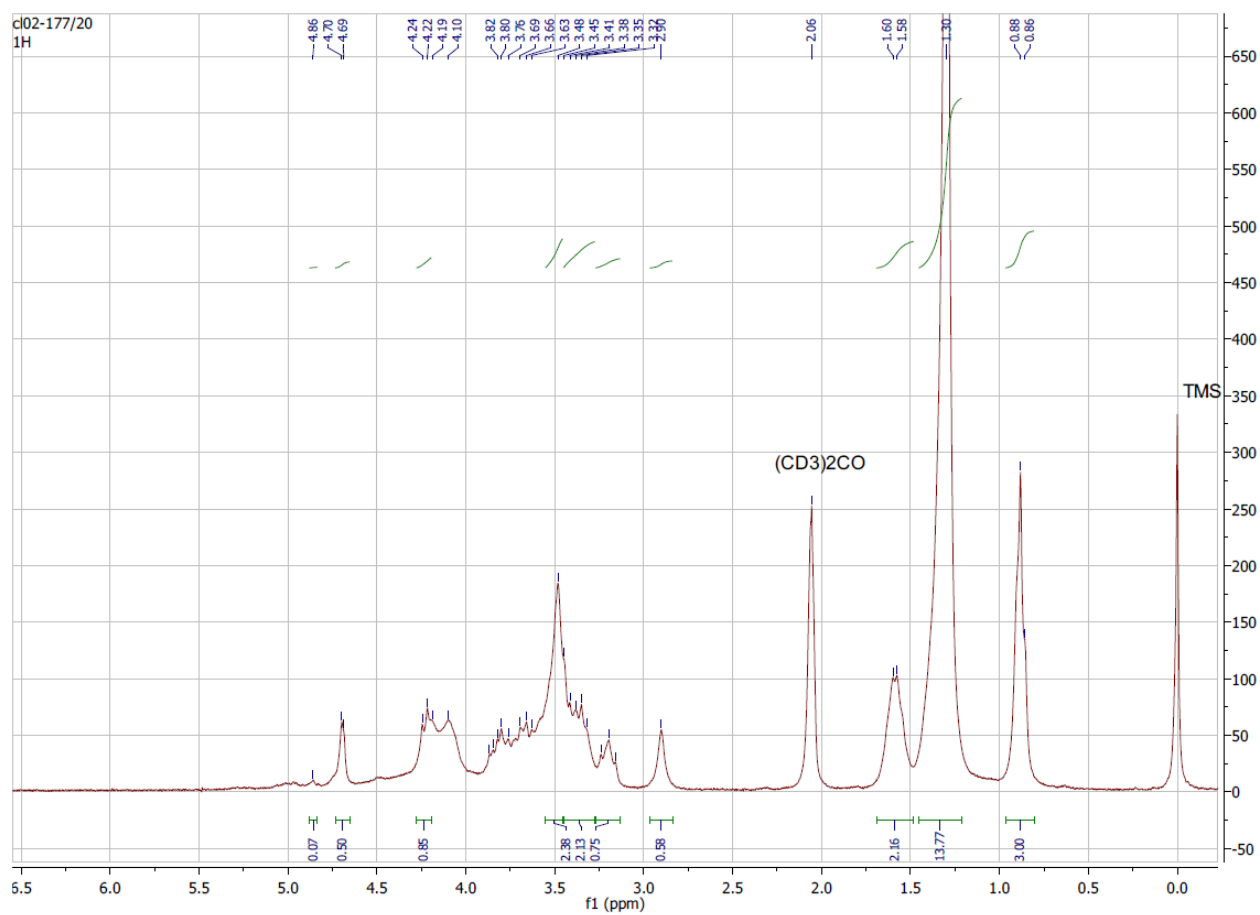

Figure 7.  $^1\text{H}$  RMN spectra (solvent  $(\text{CD}_3)_2\text{CO}$ )<sup>3</sup>

<sup>3</sup> S. Marinkovic and B. Estrine, *Green Chem.*, 2010, **12**, 1929

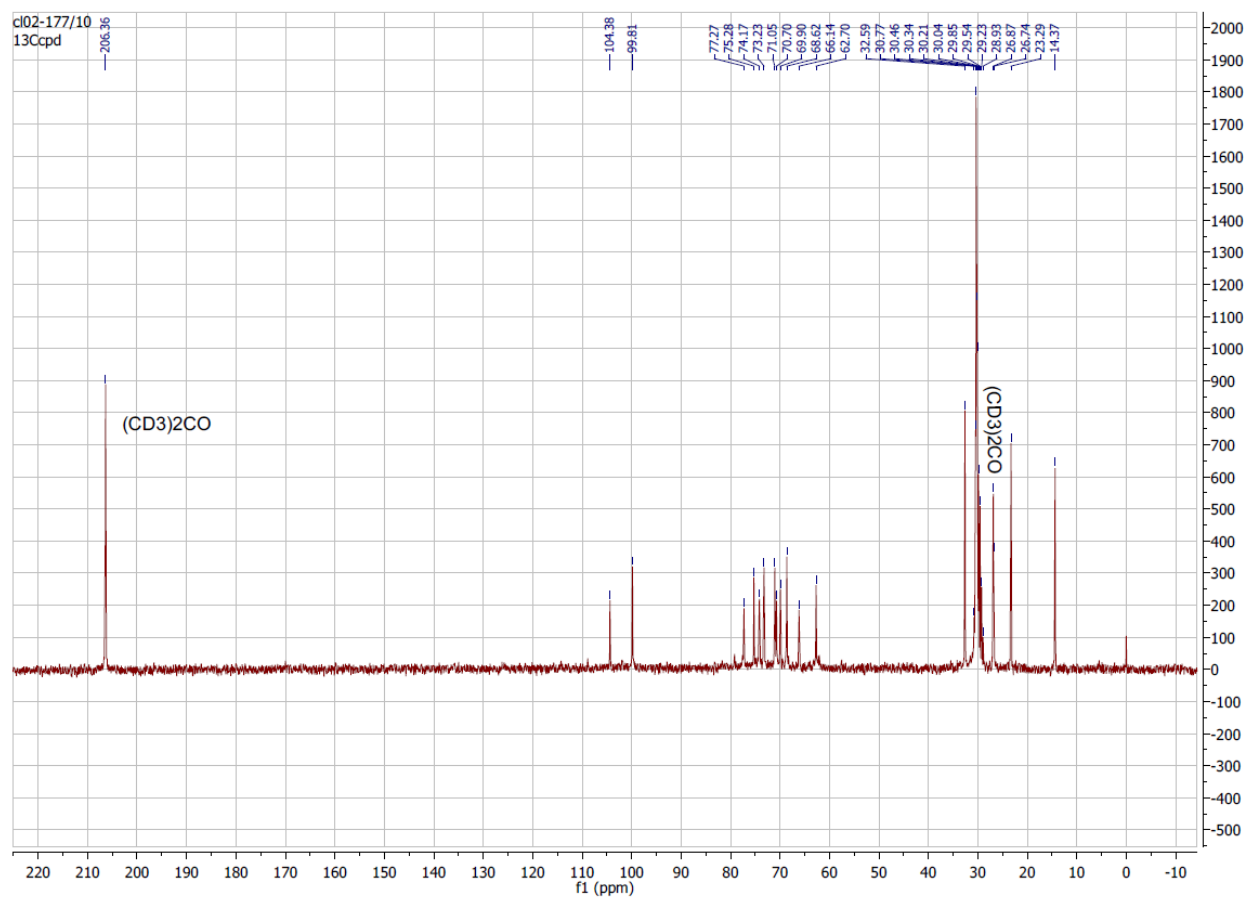

Figure 8.  $^{13}\text{C}$  RMN spectra (solvent  $(\text{CD}_3)_2\text{CO}$ )<sup>4</sup>

<sup>4</sup> S. Marinkovic and B. Estrine, *Green Chem.*, 2010, **12**, 1929
